# Supplementary material for: A rhodamine-based fluorescent probe bearing 8-hydroxyquinoline group for the highly selective detection of Hg 2+ and its practical application in cell imaging
Source: Royal Society of Chemistry journal article supplement (doi:10.1039/d4ra06115b), 2024-01-01
Supplement: d4ra06115b1.pdf [file d4ra06115b1.pdf]

## *Supporting information*

### **Rhodamine-based fluorescent probe bearing 8-hydroxyquinoline group for the highly selective detection of Hg<sup>2+</sup> and its practical application in cells imaging**

Lei Zhang,<sup>a</sup> Jun Guo,<sup>b</sup> Qihua You<sup>c,\*</sup>

<sup>a</sup> Department of Biology, Xinzhou Normal University, Xinzhou, Shanxi Province 034000, P. R. of China.

<sup>b</sup> ShanXi Weipu Testing Technology Co. Ltd, Taiyuan, Shanxi Province 030012, P. R. of China

<sup>c</sup> Department of Chemical and Biological Engineering, Hong Kong University of Science and Technology, Clear Water Bay Road, Saikung, Hong Kong SAR

Email Address: [qihuayou@ust.hk](mailto:qihuayou@ust.hk)

### **Table of Contents**

|                  |                                                                                             | Page |
|------------------|---------------------------------------------------------------------------------------------|------|
| <b>Table S1</b>  | Comparison of <b>RHOQ</b> with other Hg <sup>2+</sup> probes.                               | 3    |
| <b>Figure S1</b> | <sup>1</sup> H-NMR (400 MHz, CDCl <sub>3</sub> ) spectrum of compound <b>1</b> .            | 5    |
| <b>Figure S2</b> | <sup>13</sup> C-NMR (100 MHz, CDCl <sub>3</sub> ) spectrum of compound <b>1</b> .           | 5    |
| <b>Figure S3</b> | <sup>1</sup> H-NMR (400 MHz, DMSO- <i>d</i> <sub>6</sub> ) spectrum of compound <b>2</b> .  | 6    |
| <b>Figure S4</b> | <sup>13</sup> C-NMR (100 MHz, DMSO- <i>d</i> <sub>6</sub> ) spectrum of compound <b>2</b> . | 6    |
| <b>Figure S5</b> | <sup>1</sup> H-NMR (400 MHz, CD <sub>3</sub> CN) spectrum of probe <b>RHOQ</b> .            | 7    |
| <b>Figure S6</b> | <sup>13</sup> C-NMR (100 MHz, CD <sub>3</sub> CN) spectrum of probe <b>RHOQ</b> .           | 7    |
| <b>Figure S7</b> | HRMS spectrum of probe <b>RHOQ</b> .                                                        | 8    |

|                   |                                                                                                                                                                                          |   |
|-------------------|------------------------------------------------------------------------------------------------------------------------------------------------------------------------------------------|---|
| <b>Figure S8</b>  | Absorption spectra of mixture of <b>RHOQ</b> (10 $\mu\text{M}$ ) and $\text{Hg}^{2+}$ (40 equiv.) upon addition of different metal ions in MeOH-Tris buffer (20 mM, pH = 7.4, 1:9, v/v). | 8 |
| <b>Figure S9</b>  | Fluorescence intensity at 594 nm of <b>RHOQ</b> (10 $\mu\text{M}$ ) as a function of concentration of $\text{Hg}^{2+}$ (0-120 $\mu\text{M}$ ).                                           | 9 |
| <b>Figure S10</b> | Cell viability of HeLa cells treated with various concentrations (0, 5, 10, 20, 30 $\mu\text{M}$ ) of <b>RHOQ</b> for 24 h. Cell viability was assessed by using the MTT assay.          | 9 |

**Table S1.** Comparison of RHOQ with other Hg<sup>2+</sup> probes.

| Probe                                                                               | $\lambda_{\text{abs}}/\lambda_{\text{em}}$<br>(nm) | linear range       | LOD                 | Response time | Fluorescence enhancement ratio | Reference                                                                                                                                                    |
|-------------------------------------------------------------------------------------|----------------------------------------------------|--------------------|---------------------|---------------|--------------------------------|--------------------------------------------------------------------------------------------------------------------------------------------------------------|
| 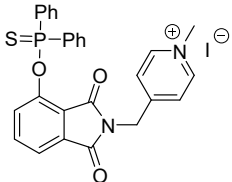   | 315/510                                            | 0-4 $\mu\text{M}$  | 0.51 $\mu\text{M}$  | 20 min        | 18-fold                        | A. Ren, W. Yao and D. Zhu, <i>Analyst</i> , 2023, <b>148</b> , 5882.                                                                                         |
|    | 424/585                                            | 0-50 $\mu\text{M}$ | 0.582 $\mu\text{M}$ | 12 min        | 4-fold                         | S. Pei, C. Li, X. Pei, X. Zhang, Y. Chi, W. Zeng, Y. Zhang, X. Liao and J. Chen, <i>Anal. Methods</i> , 2023, <b>15</b> , 3026.                              |
|    | 477/620                                            | 0-80 $\mu\text{M}$ | 0.224 $\mu\text{M}$ | 40 min        | 20-fold                        | J. Tian, X. Tian, S. Gong, Y. Liang, Z. Meng, W. Liu, X. Xu, Z. Wang and S. Wang, <i>Anal. Methods</i> , 2024, <b>16</b> , 1846.                             |
|   | -/570                                              | -                  | 0.146 $\mu\text{M}$ | < 5 s         | -                              | M. Yu, T. Fu, W. Li, Y. Zhang, H. Wen, M. Zheng, M. Shi, C. Liu, M. Jin, K. Liu, L. Cai, B. Zhu and W. Sheng, <i>New J. Chem.</i> , 2023, <b>47</b> , 22103. |
|  | -/440                                              | 1-4 $\mu\text{M}$  | 273 ppb             | 20 min        | 14-fold                        | L. Li, H. Ouyang, Z. Long, Q. Zhang, Y. Jiang, M. Cai, S. Xiong, S. Peng, G. Xu and Q. He, <i>Org. Biomol. Chem.</i> , 2023, <b>21</b> , 5560.               |

|                                                                                                                                   |         |                     |                         |         |          |                                                                                                                                     |
|-----------------------------------------------------------------------------------------------------------------------------------|---------|---------------------|-------------------------|---------|----------|-------------------------------------------------------------------------------------------------------------------------------------|
| 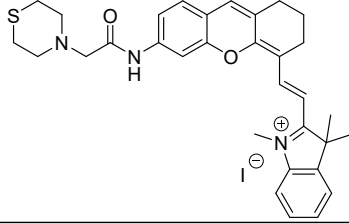                                                 | 615/674 | 0-25 $\mu\text{M}$  | 1.41 $\mu\text{M}$      | < 1 min | -        | S. Fang, L. Zhang, Y. Zhao, X. Zhang, L. Zhang, L. Chen, J. Yoon and S. Liu, <i>Sens. Actuators, B</i> , 2024, <b>411</b> , 135768. |
|                                                  | 505/585 | -                   | 0.33 nM                 | 40 min  | 150-fold | B. Du, Q. Li, K. Huang, Q. Wang and L. Liang, <i>J. Photochem. Photobiol., A</i> , 2023, <b>436</b> , 114419.                       |
|                                                  | 565/585 | 0-200 $\mu\text{M}$ | 2.32 $\mu\text{M}$      | 10 min  | -        | D. Wu, M. Ma, M. Zhang, Y. Xiao, H. Yu, Y. Shao, X. Zhang, Z. Cheng and Y. Xiao, <i>Dyes Pigm.</i> , 2022, <b>198</b> , 110001.     |
|  <p style="text-align: center;"><b>RHOQ</b></p> |         | 0-120 $\mu\text{M}$ | $9.67 \times 10^{-8}$ M | < 2 min | 550-fold | This work                                                                                                                           |



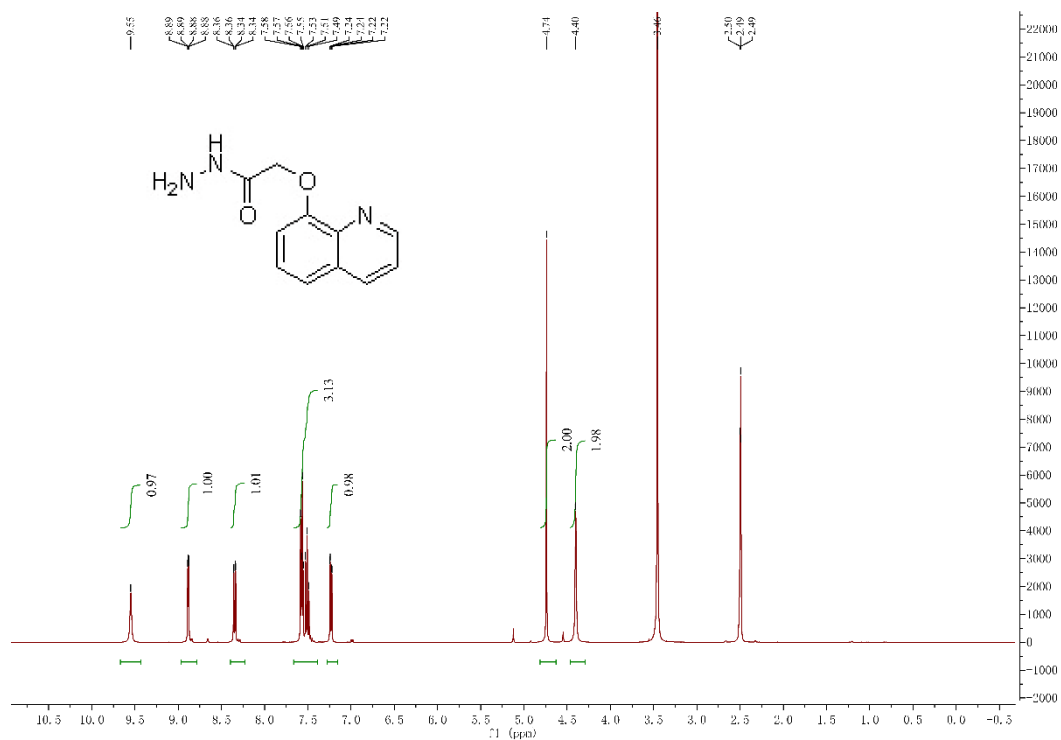

Figure S3.  $^1\text{H-NMR}$  (400 MHz,  $\text{DMSO-}d_6$ ) spectrum of compound 2.

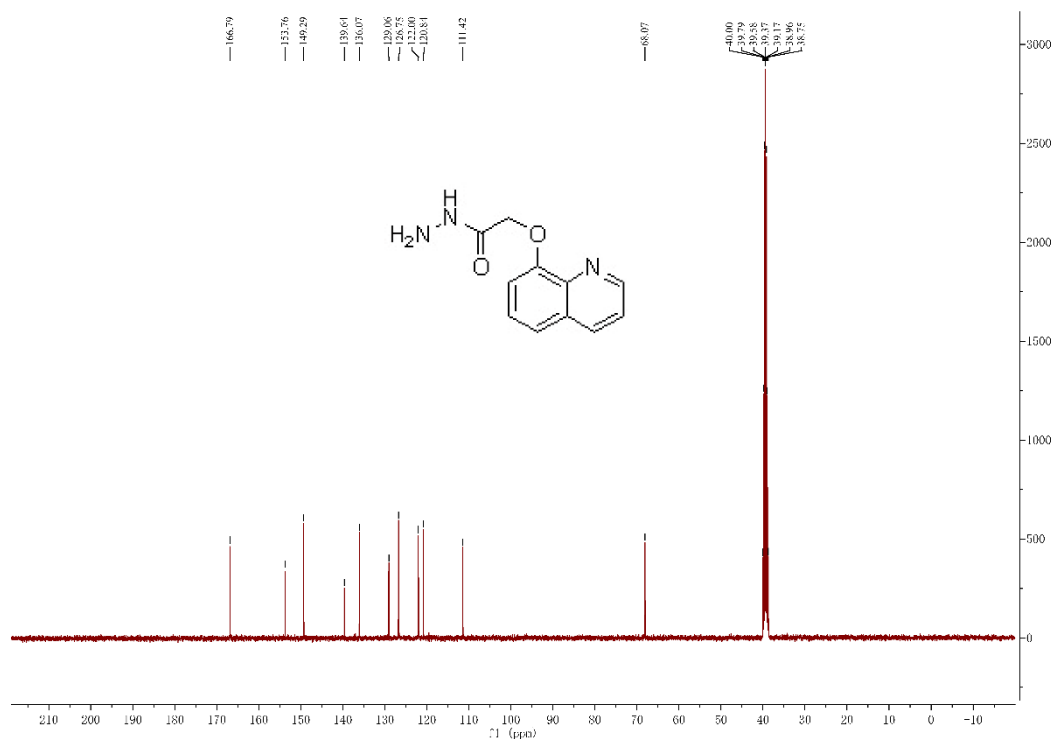

Figure S4.  $^{13}\text{C-NMR}$  (100 MHz,  $\text{DMSO-}d_6$ ) spectrum of compound 2.

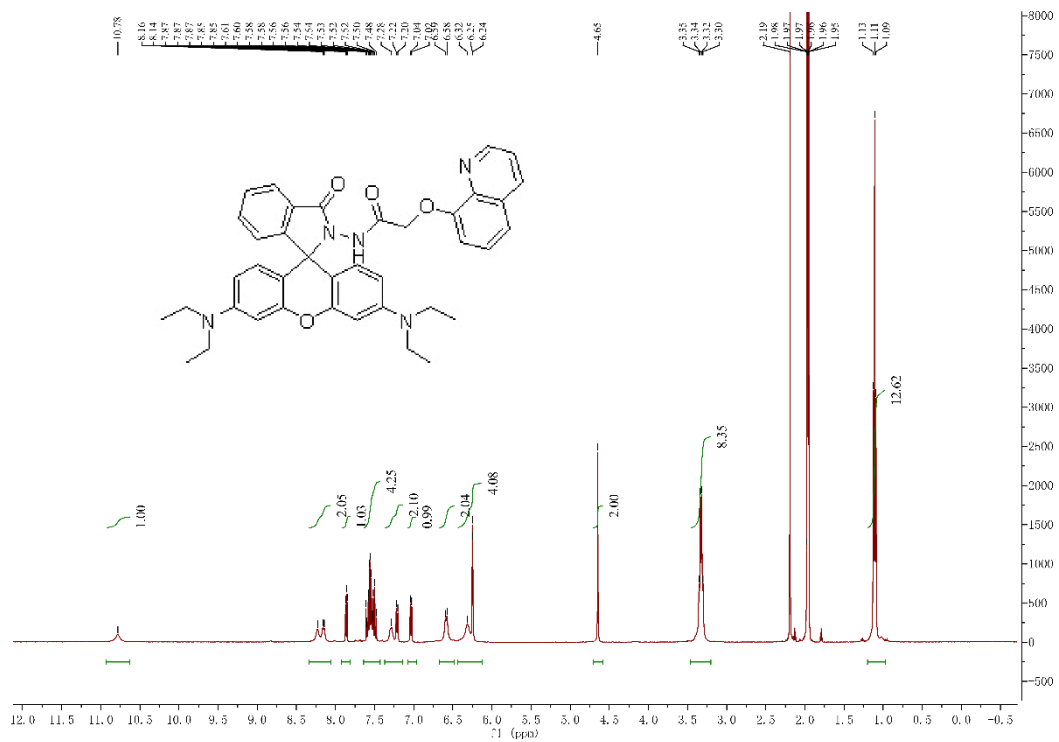

Figure S5.  $^1\text{H-NMR}$  (400 MHz,  $\text{CD}_3\text{CN}$ ) spectrum of probe RHOQ.

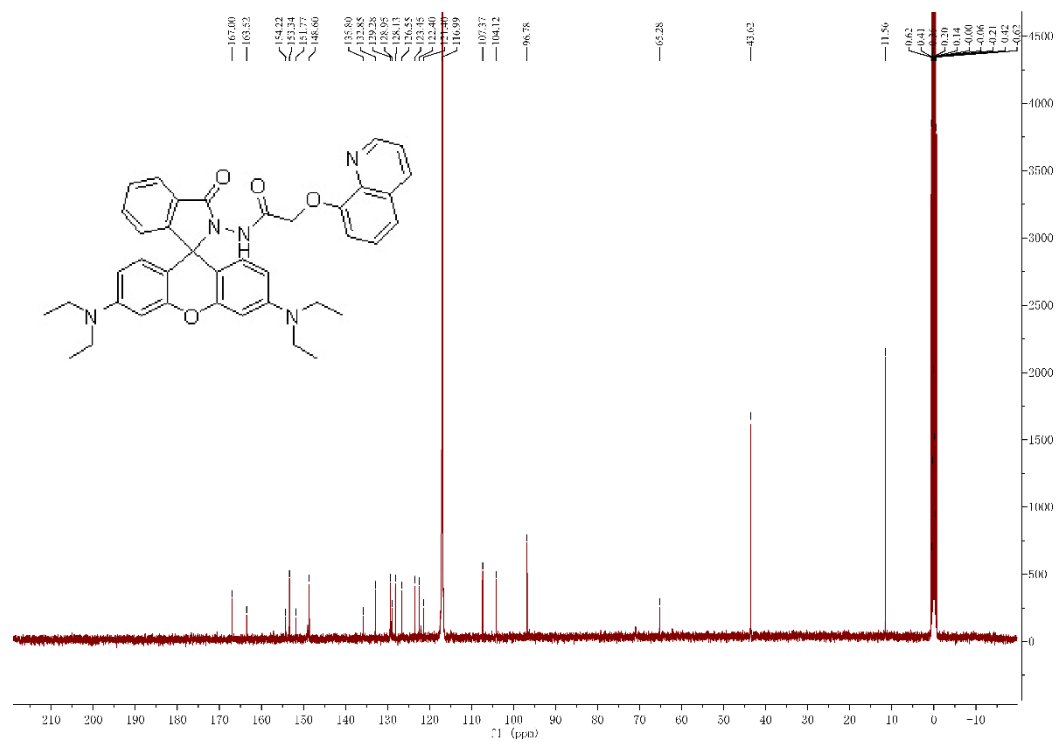

Figure S6.  $^{13}\text{C-NMR}$  (100 MHz,  $\text{CD}_3\text{CN}$ ) spectrum of probe RHOQ.

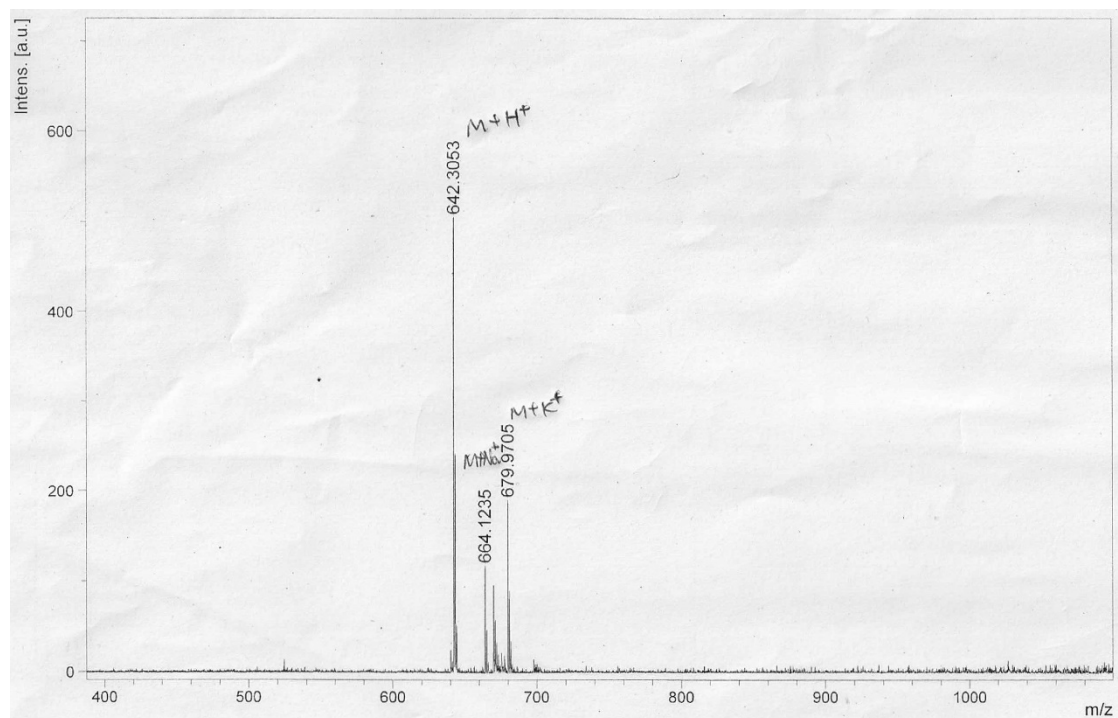

**Figure S7.** HRMS spectrum of probe **RHOQ**.

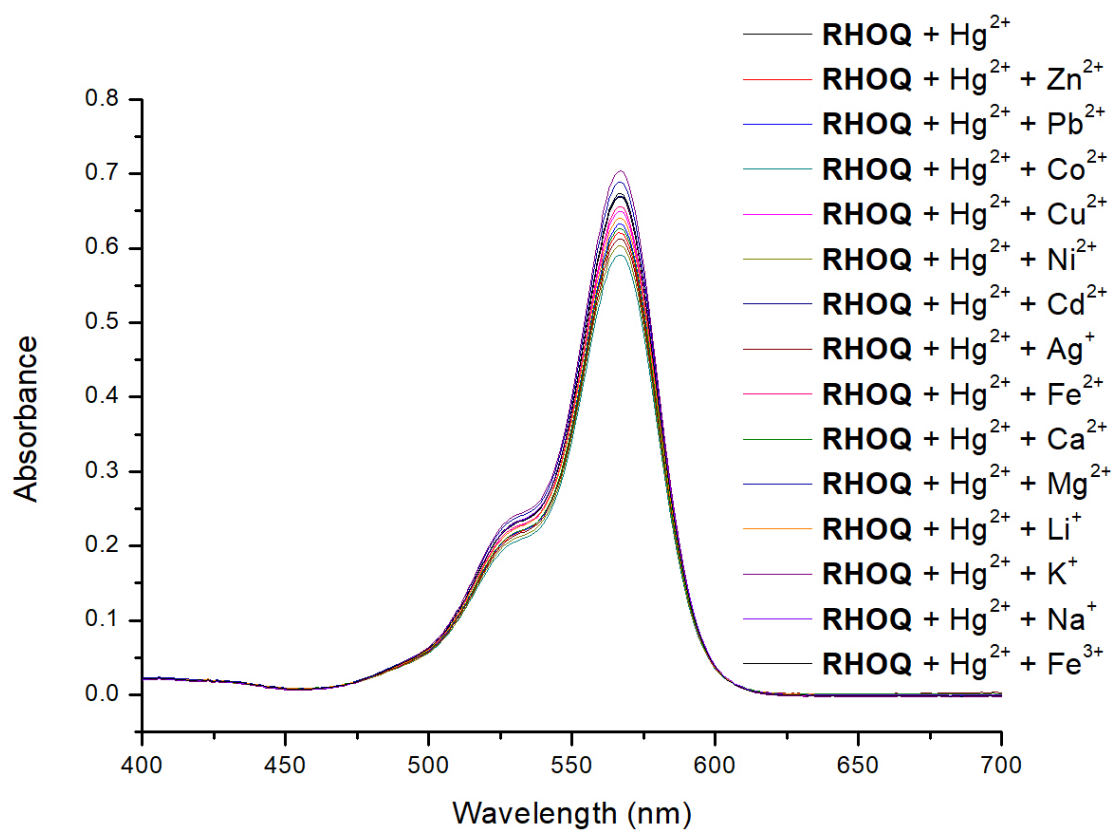

**Figure S8.** Absorption spectra of mixture of **RHOQ** (10  $\mu\text{M}$ ) and  $\text{Hg}^{2+}$  (40 equiv.) upon addition of different metal ions in MeOH-Tris buffer (20 mM, pH = 7.4, 1:9, v/v).



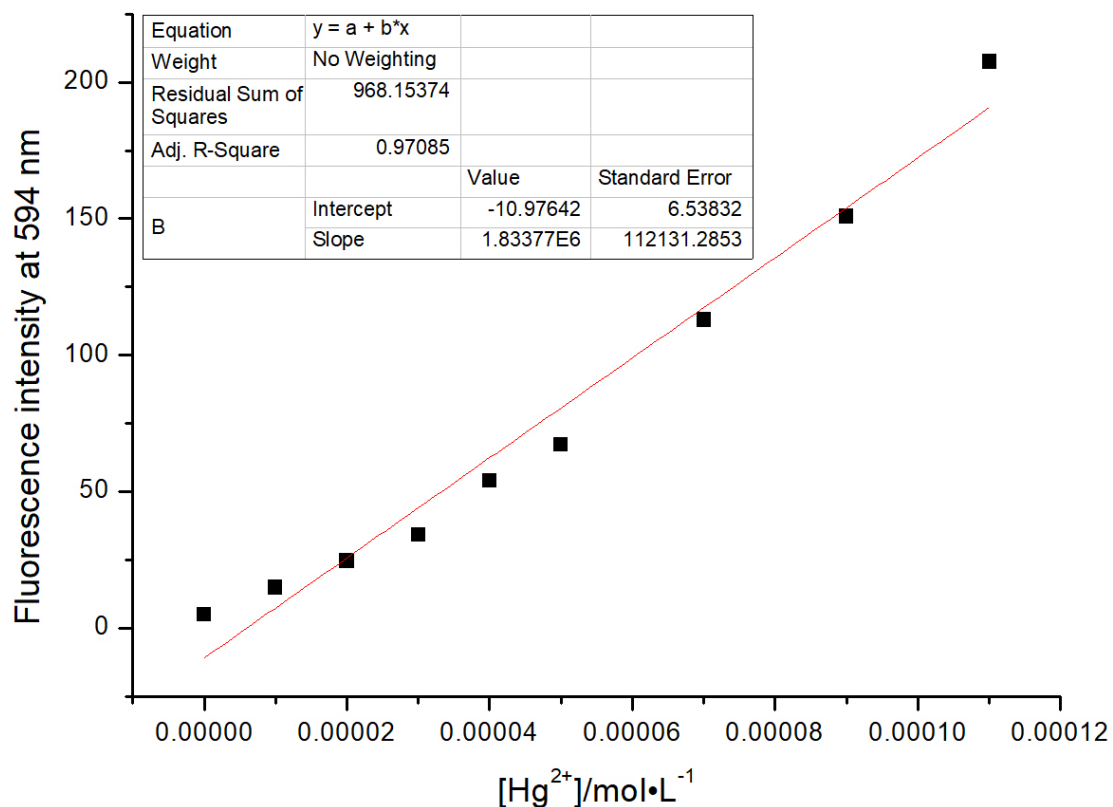

**Figure S9.** Fluorescence intensity at 594 nm of **RHOQ** (10  $\mu\text{M}$ ) as a function of concentration of  $\text{Hg}^{2+}$  (0-120  $\mu\text{M}$ ).

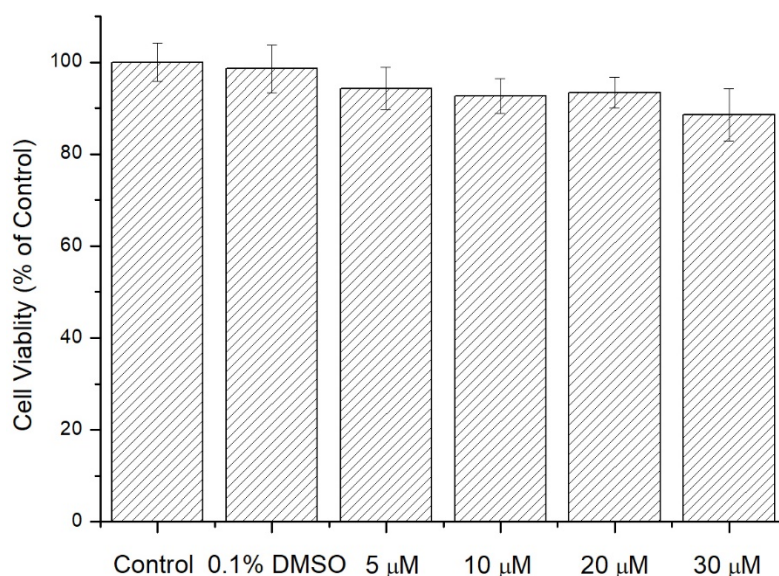

**Figure S10.** Cell viability of HeLa cells treated with various concentrations (0, 5, 10, 20, 30  $\mu\text{M}$ ) of **RHOQ** for 24 h. Cell viability was assessed by using the MTT assay. The results were presented as means  $\pm$  SE with replicates n = 3.
